# Supplementary material for: All-solution-processed fluorene/dibenzothiophene-S,S-dioxide blue co-oligomer light-emitting diodes with an electron transporting PEI/ultrafine-ZnO-nanoparticle bilayer
Source: Royal Society of Chemistry journal article supplement (doi:10.1039/c7ra07652e), 2017-01-01
Supplement: c7ra07652e1.pdf [file c7ra07652e1.pdf]

## Supplementary Information

### All-solution-processed fluorene/dibenzothiophene-S,S-dioxide blue co-oligomer light-emitting diodes with an electron transporting PEI/ultrafine-ZnO-nanoparticle bilayer

Chun-Yuan Huang,<sup>\*a</sup> Chiao-Yang Cheng<sup>b</sup> and Yu-Shan Shih<sup>a</sup>

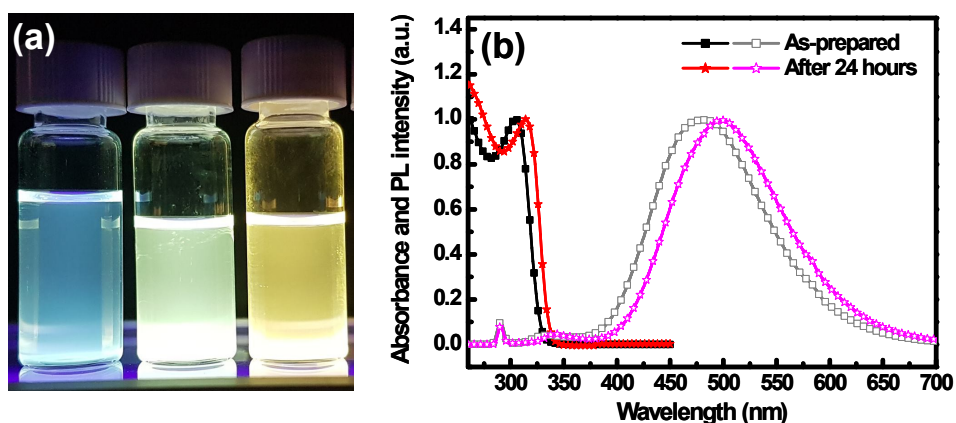

Fig. S1. (a) Photographs of PL emission of as-prepared ZnO NP solutions synthesized at different conditions. (b) Absorption and PL spectra of blue emitting ZnO NP solution before and after storing for 24 hours.

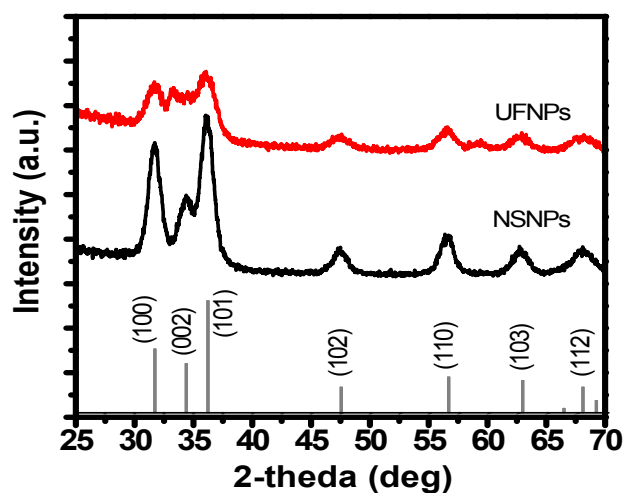

Fig. S2. XRD patterns of NSNPs, UFNPs, and standard ZnO wurtzite structure with peak indexed (JCPDS card No. 36-1451).

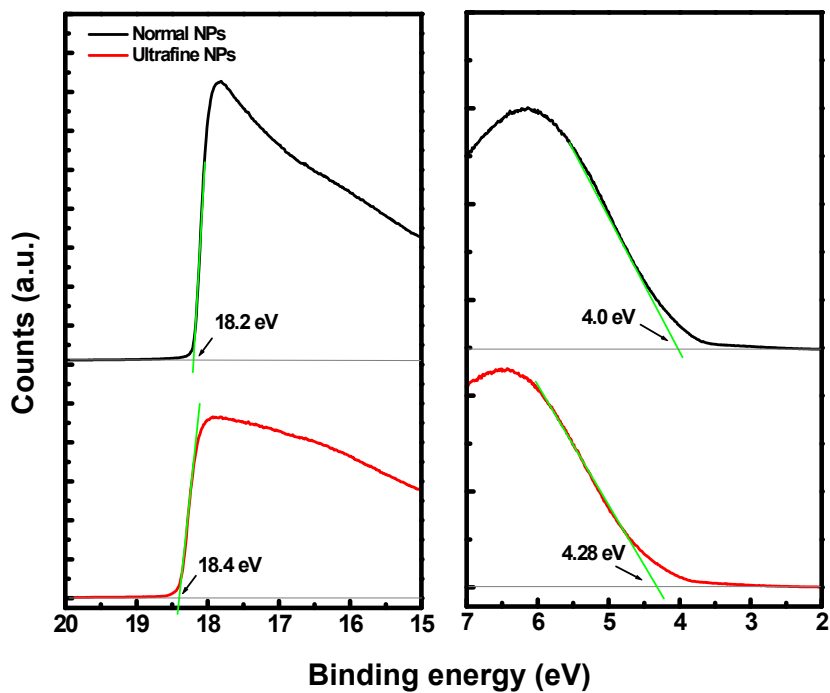

Fig. S3. UPS of normal-sized and ultrafine ZnO NPs.

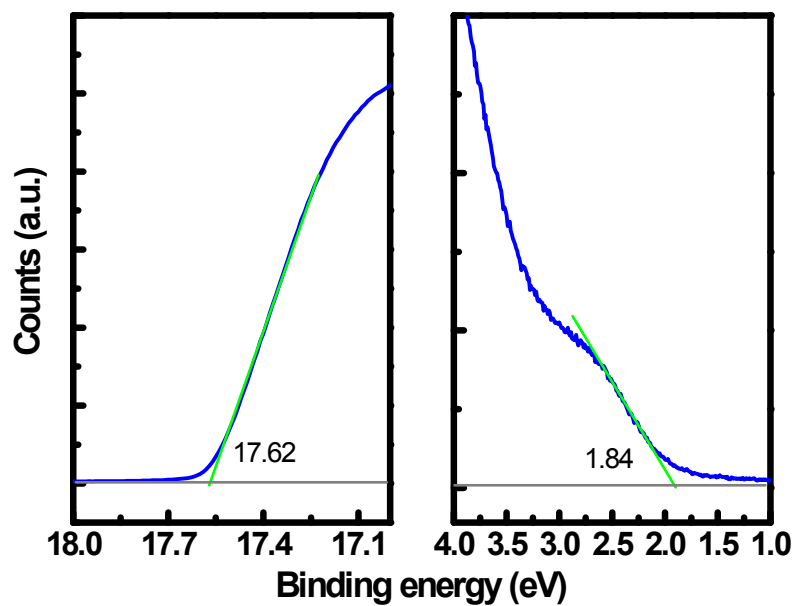

Fig. S4. UPS of the HFSO film.
